# Supplementary material for: Lipid profile of platelets and platelet-derived microparticles in ovarian cancer
Source: PubMed Central journal article supplement — BBA Clin. 2016 Jun 30;6:76–81. doi: 10.1016/j.bbacli.2016.06.003 (PMC4941562; doi:10.1016/j.bbacli.2016.06.003), 2016-06-30
Supplement: mmc1.pdf [file mmc1.pdf]

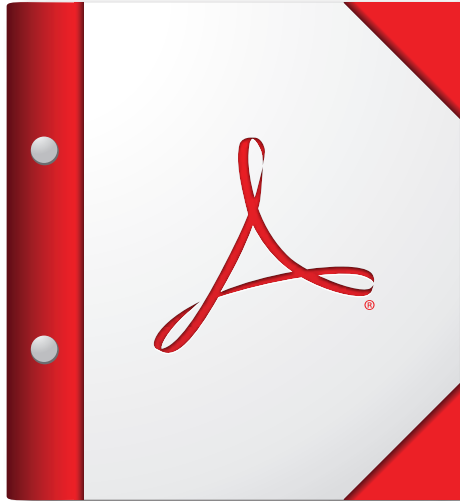

**For the best experience, open this PDF portfolio in  
Acrobat 9 or Adobe Reader 9, or later.**

[Get Adobe Reader Now!](#)
