# Supplementary material for: Lipid profile of platelets and platelet-derived microparticles in ovarian cancer
Source: PubMed Central journal article supplement — BBA Clin. 2016 Jun 30;6:76–81. doi: 10.1016/j.bbacli.2016.06.003 (PMC4941562; doi:10.1016/j.bbacli.2016.06.003), 2016-06-30
Supplement: mmc2.pdf [file mmc2.pdf]

## Supplementary Materials

### Figure Legends

**Figure S1:** Lipidomics of platelets and MPs derived from cancer patients and healthy controls. A) Comparison of total lipid contents in both platelets and MPs between the subjects of control and cancer. No significant difference (NS) was observed. B) A representative mass spectrometric analysis showing lipid composition difference of 18:0-20:4 PI species in human platelet microparticles between healthy controls and cancer patients.

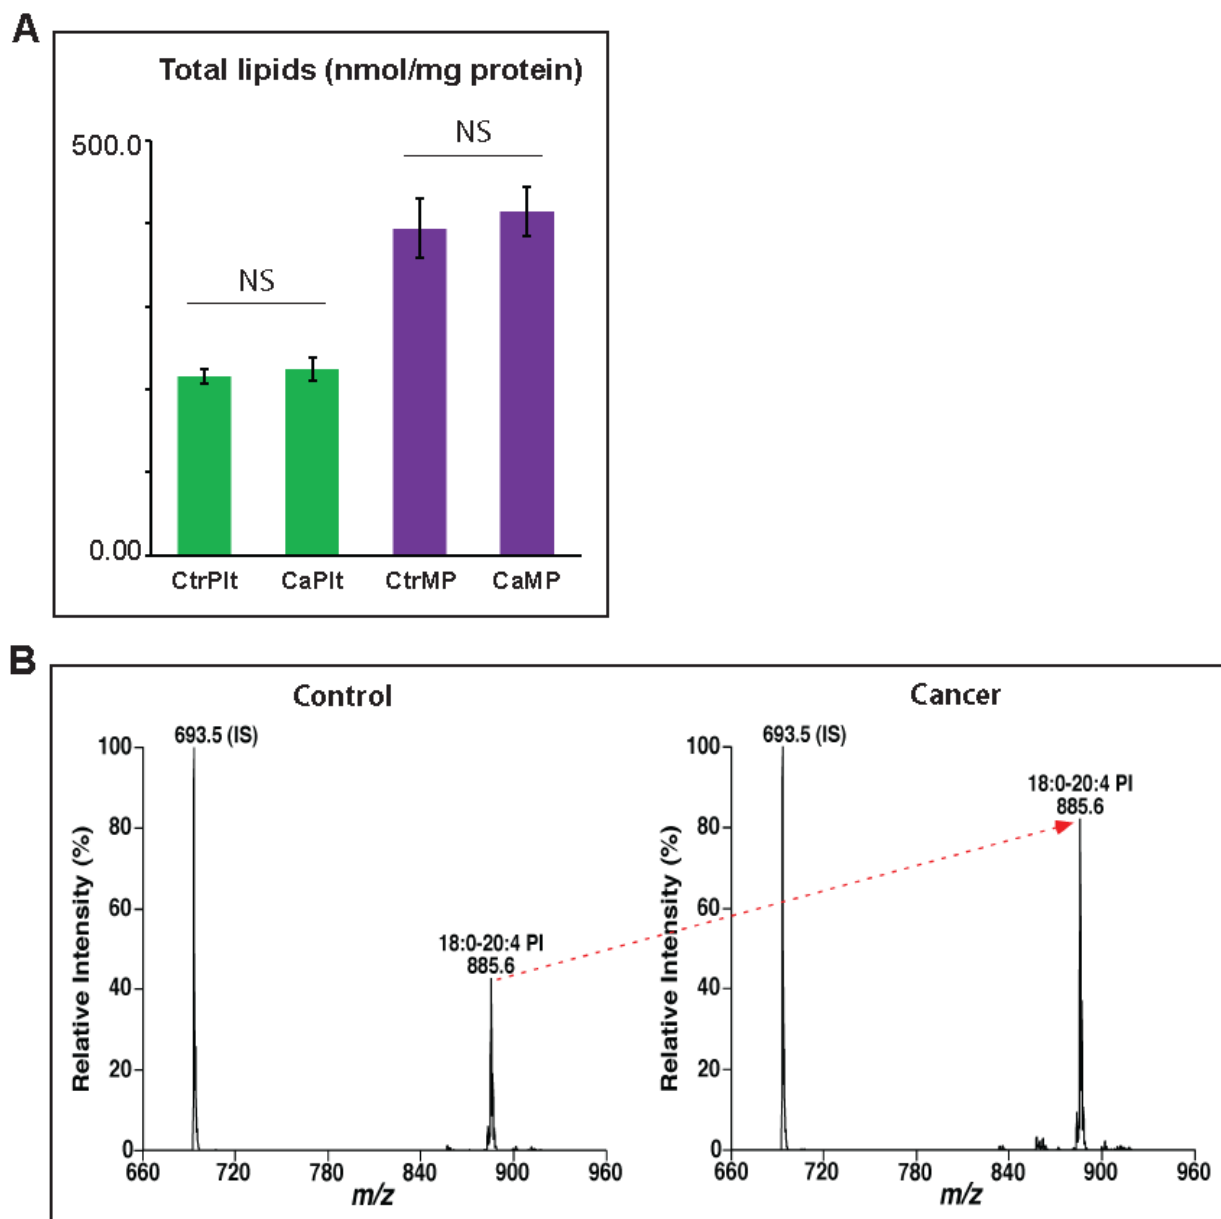

**Figure S1**

**Table s1.** Enriched or depleted lipid classes and species in MPs of both control and cancer subjects

| Class | Affected              | CtrlPt           | CtrlPMP          | <i>p</i> | CaPt             | CaPMP            | <i>p</i> |
|-------|-----------------------|------------------|------------------|----------|------------------|------------------|----------|
| PC    | Class sum             | 291.234 ± 33.313 | 218.034 ± 7.498  | 0.153    | 264.035 ± 6.926  | 225.453 ± 13.125 | 0.079    |
|       | A16:0-16:0            | 0.973 ± 0.098    | 0.842 ± 0.117    | 0.439    | 1.401 ± 0.069    | 0.864 ± 0.052    | **       |
|       | P16:0-18:1/P18:1-16:0 | 1.822 ± 0.640    | 1.651 ± 0.326    | 0.828    | 1.404 ± 0.071    | 1.091 ± 0.106    | 0.079    |
|       | D18:2-18:2/D16:0-20:4 | 28.516 ± 2.856   | 16.851 ± 1.550   | *        | 18.274 ± 5.145   | 12.500 ± 3.331   | 0.408    |
|       | D16:0-22:6/D18:2-20:4 | 3.308 ± 0.075    | 2.425 ± 0.139    | *        | 6.641 ± 3.767    | 5.093 ± 2.541    | 0.753    |
|       | D18:1-20:4/D16:0-22:5 | 10.614 ± 1.630   | 4.815 ± 0.511    | 0.06     | 9.414 ± 0.089    | 6.844 ± 0.164    | **       |
|       | D18:2-20:2/D18:0-20:4 | 21.177 ± 4.059   | 16.340 ± 2.167   | 0.098    | 18.662 ± 0.890   | 14.922 ± 0.520   | *        |
|       | D18:2-22:6            | 1.302 ± 0.097    | 0.780 ± 0.078    | *        | 2.725 ± 1.642    | 2.143 ± 1.454    | 0.804    |
|       | D18:1-22:6/D18:2-22:5 | 1.564 ± 0.188    | 0.945 ± 0.054    | 0.071    | 4.129 ± 2.556    | 2.668 ± 1.623    | 0.659    |
| CAR   | Class sum             | 80.662 ± 24.400  | 197.982 ± 36.955 | 0.066    | 113.828 ± 16.813 | 159.828 ± 27.793 | 0.244    |
|       | 14:0                  | 4.699 ± 1.148    | 4.343 ± 0.956    | 0.824    | 6.203 ± 2.225    | 1.358 ± 0.189    | *        |
|       | 18:0                  | 22.911 ± 7.540   | 137.525 ± 12.158 | **       | 35.584 ± 10.819  | 120.981 ± 34.336 | 0.120    |
| PI    | Class sum             | 32.574 ± 5.147   | 16.397 ± 2.608   | 0.069    | 43.503 ± 5.027   | 31.528 ± 2.559   | **       |
|       | 16:0-18:1             | 0.038 ± 0.029    | 0.075 ± 0.020    | 0.349    | 0.150 ± 0.041    | 0.311 ± 0.010    | *        |
|       | 16:0-20:4             | 0.990 ± 0.080    | 0.507 ± 0.011    | *        | 1.544 ± 0.113    | 1.240 ± 0.131    | 0.154    |
|       | 18:0-20:4             | 27.121 ± 4.491   | 13.325 ± 2.689   | 0.071    | 37.645 ± 5.814   | 24.128 ± 1.608   | 0.137    |
| PG    | Class sum             | 0.850 ± 0.208    | 1.839 ± 0.173    | *        | 0.753 ± 0.323    | 2.690 ± 0.337    | **       |
|       | 16:0-16:0             | 0.005 ± 0.002    | 0.017 ± 0.003    | *        | 0.005 ± 0.002    | 0.023 ± 0.10     | 0.199    |
|       | 16:0-18:1             | 0.168 ± 0.058    | 0.432 ± 0.076    | *        | 0.079 ± 0.018    | 0.663 ± 0.153    | 0.060    |
|       | 18:2-18:2             | 0.016 ± 0.001    | 0.157 ± 0.019    | *        | 0.022 ± 0.007    | 0.234 ± 0.069    | 0.090    |
|       | 18:1-18:2             | 0.007 ± 0.002    | 0.041 ± 0.010    | 0.073    | 0.022 ± 0.006    | 0.135 ± 0.028    | *        |
|       | 18:0-18:1             | 0.170 ± 0.073    | 0.374 ± 0.019    | 0.101    | 0.060 ± 0.034    | 0.421 ± 0.017    | **       |
|       | 18:1-20:4             | 0.016 ± 0.006    | 0.099 ± 0.053    | 0.257    | 0.032 ± 0.009    | 0.191 ± 0.053    | 0.091    |
| PA    | Class sum             | 0.477 ± 0.089    | 1.975 ± 0.516    | 0.097    | 0.564 ± 0.095    | 1.177 ± 0.093    | **       |
|       | 16:0-18:2             | 0.057 ± 0.004    | 0.070 ± 0.005    | 0.101    | 0.079 ± 0.006    | 0.140 ± 0.077    | 0.515    |
|       | 16:0-18:1             | 0.027 ± 0.003    | 0.078 ± 0.017    | 0.089    | 0.053 ± 0.004    | 0.086 ± 0.006    | **       |
|       | 18:0-18:1             | 0.087 ± 0.031    | 0.164 ± 0.021    | 0.121    | 0.079 ± 0.016    | 0.172 ± 0.030    | 0.071    |
|       | 18:0-20:4             | 0.241 ± 0.039    | 1.567 ± 0.507    | 0.119    | 0.298 ± 0.091    | 0.659 ± 0.120    | 0.080    |
| PS    | 20:0-20:2/18:0-22:2   | 0.776 ± 0.107    | 1.090 ± 0.079    | 0.083    | 0.945 ± 0.226    | 1.460 ± 0.076    | 0.140    |
|       | 20:0-22:3             | 0.077 ± 0.017    | 0.132 ± 0.021    | 0.113    | 0.039 ± 0.023    | 0.202 ± 0.039    | *        |
|       | 20:0-22:2             | 0.037 ± 0.037    | 0.141 ± 0.014    | 0.092    | 0.015 ± 0.009    | 0.217 ± 0.033    | *        |
| LPC   | 18:1                  | 0.610 ± 0.052    | 1.082 ± 0.103    | *        | 0.510 ± 0.056    | 0.534 ± 0.122    | 0.868    |
|       | 16:1                  | 0.429 ± 0.074    | 0.274 ± 0.085    | 0.241    | 0.482 ± 0.070    | 0.250 ± 0.067    | 0.074    |
| PE    | D16:0-22:6            | 2.537 ± 0.177    | 1.876 ± 0.099    | *        | 2.191 ± 0.106    | 2.248 ± 0.172    | 0.795    |

For each lipid class or species, the data is expressed as mean ± sem at ppt (n=3). Yellow color is highlighted only for class level lipid enrichment or depletion in MPs. \* indicates  $p \leq 0.05$  and \*\*  $p \leq 0.01$ .

Table s2-Lipidomic analysis for human platelet and platelet micro-particle from ovarian cancer patients and normal Subjects

| Lipid                                                  |                     | CaPit-1      | CaPit-2      | CaPit-3      | CtrlPit-1    | CtrlPit-2    | CtrlPit-3    | CaPMP-1       | CaPMP-2       | CaPMP-3       | CtrlPMP-1    | CtrlPMP-2     | CtrlPMP-3     |
|--------------------------------------------------------|---------------------|--------------|--------------|--------------|--------------|--------------|--------------|---------------|---------------|---------------|--------------|---------------|---------------|
| <b>Phosphatidylethanolamine (PE) (nmol/mg protein)</b> | <b>MASS:PE-FMOC</b> | <b>#03</b>   | <b>#05</b>   | <b>#06</b>   | <b>#01</b>   | <b>#07</b>   | <b>#08</b>   | <b>#04</b>    | <b>#09</b>    | <b>#10</b>    | <b>#02</b>   | <b>#11</b>    | <b>#12</b>    |
| P16:0-18:2                                             | 920.51              | 0.42         | 0.09         | 0.10         | 0.28         | 0.08         | 0.12         | 0.78          | 0.27          | 0.20          | 0.45         | 0.34          | 0.23          |
| P18:1-16:0/P16:0-18:1                                  | 922.53              | 1.06         | 0.39         | 0.39         | 0.52         | 0.41         | 0.35         | 1.96          | 0.83          | 0.91          | 0.98         | 1.08          | 0.66          |
| D16:0-18:2/D16:1-18:1                                  | 936.51              | 0.64         | 1.10         | 0.41         | 0.47         | 0.36         | 0.25         | 1.59          | 1.34          | 0.73          | 0.67         | 0.42          | 0.47          |
| D16:0-18:1                                             | 938.52              | 1.43         | 1.04         | 0.85         | 0.98         | 0.69         | 0.70         | 3.09          | 2.12          | 1.82          | 1.53         | 1.30          | 1.05          |
| P16:1-20:4/ P14:0-22:5                                 | 942.50              | 0.27         | 0.02         | 0.12         | 0.14         | 0.06         | 0.14         | 0.38          | 0.16          | 0.20          | 0.18         | 0.16          | 0.16          |
| P16:0-20:4                                             | 944.51              | 10.81        | 5.25         | 7.26         | 9.48         | 9.45         | 8.00         | 16.36         | 13.14         | 13.56         | 12.04        | 19.38         | 11.87         |
| P16:0-20:3/P18:1-18:2                                  | 946.53              | 1.31         | 0.62         | 0.54         | 1.03         | 0.55         | 0.67         | 1.38          | 1.59          | 1.39          | 0.97         | 1.25          | 1.20          |
| P18:1-18:1/P18:0-18:2/P16:0-20:2                       | 948.54              | 1.67         | 0.30         | 0.34         | 0.66         | 0.31         | 0.31         | 2.90          | 1.07          | 0.74          | 0.99         | 0.92          | 0.83          |
| P18:0-18:1/P16:0-20:1                                  | 950.56              | 1.04         | 1.21         | 0.36         | 0.48         | 0.46         | 0.25         | 1.64          | 0.77          | 0.68          | 0.67         | 0.58          | 0.52          |
| D16:1-20:4                                             | 958.49              | 0.88         | 0.43         | 0.61         | 0.55         | 0.58         | 0.75         | 1.36          | 1.19          | 0.91          | 0.81         | 1.40          | 1.00          |
| D16:0-20:4/D18:2-18:2                                  | 960.51              | 1.97         | 1.75         | 1.95         | 2.03         | 1.56         | 1.75         | 3.39          | 3.82          | 3.71          | 2.41         | 2.68          | 2.26          |
| D18:1-18:2/D16:0-20:3                                  | 962.52              | 1.71         | 0.91         | 0.63         | 0.71         | 0.29         | 0.47         | 3.27          | 2.19          | 1.15          | 1.00         | 0.69          | 0.74          |
| D18:0-18:2/D18:1-18:1/D16:0-20:2                       | 964.54              | 4.63         | 3.03         | 1.91         | 2.61         | 1.50         | 1.81         | 8.93          | 6.08          | 3.97          | 3.62         | 3.41          | 2.87          |
| D18:0-18:1/D16:0-20:1                                  | 966.55              | 1.51         | 0.75         | 0.63         | 0.88         | 0.50         | 0.77         | 3.26          | 1.73          | 1.31          | 1.35         | 1.51          | 1.13          |
| P16:0-22:6/D18:0-18:0/P18:2-20:4                       | 968.51              | 0.75         | 0.48         | 0.95         | 1.03         | 0.88         | 0.79         | 1.64          | 1.34          | 1.65          | 1.40         | 2.02          | 1.45          |
| P18:1-20:4/P16:0-22:5                                  | 970.53              | 8.57         | 3.13         | 5.00         | 5.68         | 6.44         | 6.29         | 13.66         | 8.17          | 9.27          | 7.54         | 14.07         | 8.67          |
| P18:0-20:4/P16:0-22:4/P18:1-20:3                       | 972.54              | 18.73        | 10.45        | 14.71        | 16.78        | 14.03        | 16.18        | 32.60         | 27.92         | 29.15         | 22.18        | 33.39         | 25.42         |
| P18:0-20:3                                             | 974.56              | 1.54         | 1.18         | 0.95         | 1.01         | 0.60         | 0.98         | 2.14          | 3.08          | 1.82          | 1.33         | 1.73          | 1.36          |
| P20:1-18:1/P18:1-20:1                                  | 976.58              | 0.14         | 0.00         | 0.00         | 0.18         | 0.00         | 0.00         | 0.50          | 0.12          | 0.00          | 0.17         | 0.03          | 0.05          |
| P18:1-20:0                                             | 978.59              | 0.07         | 0.13         | 0.03         | 0.11         | 0.03         | 0.05         | 0.32          | 0.14          | 0.17          | 0.14         | 0.09          | 0.09          |
| D16:0-22:6                                             | 984.51              | 0.49         | 0.41         | 0.58         | 0.64         | 0.46         | 0.54         | 0.92          | 0.91          | 0.93          | 0.65         | 0.87          | 0.69          |
| D18:1-20:4D/16:0-22:5                                  | 986.52              | 3.25         | 2.79         | 2.88         | 2.78         | 2.19         | 3.13         | 5.16          | 5.73          | 3.94          | 2.97         | 4.38          | 3.63          |
| D18:0-20:4/D16:0-22:4                                  | 988.54              | 13.18        | 10.14        | 11.37        | 12.68        | 10.57        | 14.01        | 21.52         | 24.33         | 17.92         | 15.63        | 23.18         | 18.02         |
| D18:0-20:3/D18:1-20:2/D16:0-22:3                       | 990.55              | 1.05         | 0.50         | 0.52         | 0.63         | 0.44         | 0.65         | 2.71          | 1.36          | 0.67          | 0.97         | 1.04          | 0.95          |
| P18:2-22:6/D18:1-20:1                                  | 992.57              | 0.18         | 0.14         | 0.11         | 0.30         | 0.06         | 0.12         | 0.79          | 0.34          | 0.12          | 0.41         | 0.27          | 0.30          |
| P18:1-22:6/D18:0-20:1                                  | 994.53              | 0.23         | 0.10         | 0.26         | 0.29         | 0.25         | 0.29         | 0.46          | 0.53          | 0.62          | 0.45         | 0.80          | 0.62          |
| P18:0-22:6/P18:1-22:5/D18:0-20:0                       | 996.54              | 1.00         | 0.76         | 1.50         | 1.33         | 1.21         | 1.45         | 2.00          | 2.06          | 3.11          | 1.93         | 3.19          | 2.41          |
| P18:0-22:5/P18:1-22:4                                  | 998.56              | 3.25         | 1.38         | 2.48         | 2.80         | 3.14         | 3.50         | 6.51          | 3.75          | 4.31          | 3.80         | 7.55          | 5.68          |
| P18:0-22:4/P20:0-20:4/P18:1-22:3                       | 1000.58             | 4.13         | 2.19         | 3.71         | 5.19         | 3.92         | 4.73         | 7.80          | 6.09          | 8.02          | 6.98         | 10.01         | 7.68          |
| A20:0-20:4/P18:0-22:3                                  | 1002.59             | 0.58         | 0.36         | 0.29         | 0.50         | 0.30         | 0.45         | 0.85          | 0.91          | 0.60          | 0.61         | 0.64          | 0.56          |
| A20:0-20:3/P18:0-22:2                                  | 1004.61             | 0.06         | 0.00         | 0.00         | 0.15         | 0.00         | 0.00         | 0.16          | 0.02          | 0.00          | 0.14         | 0.01          | 0.01          |
| D18:1-22:6                                             | 1010.52             | 0.19         | 0.18         | 0.19         | 0.17         | 0.11         | 0.18         | 0.42          | 0.33          | 0.25          | 0.17         | 0.25          | 0.16          |
| D18:0-22:6/D18:1-22:5                                  | 1012.54             | 0.47         | 0.56         | 0.73         | 0.66         | 0.60         | 0.78         | 0.61          | 1.49          | 1.11          | 0.81         | 1.27          | 1.06          |
| D18:0-22:5/D18:1-22:4                                  | 1014.55             | 0.86         | 0.79         | 1.00         | 1.01         | 1.00         | 1.29         | 1.61          | 1.72          | 1.64          | 1.25         | 2.32          | 1.69          |
| D20:0-20:4/D18:0-22:4                                  | 1016.57             | 0.54         | 0.57         | 0.68         | 0.94         | 0.98         | 1.17         | 1.11          | 1.61          | 1.19          | 1.29         | 2.34          | 1.75          |
| <b>Sum</b>                                             |                     | <b>88.61</b> | <b>58.43</b> | <b>70.42</b> | <b>75.69</b> | <b>64.00</b> | <b>72.93</b> | <b>153.77</b> | <b>128.24</b> | <b>117.75</b> | <b>98.47</b> | <b>144.55</b> | <b>107.23</b> |
| <b>Ceramide (CER) (nmol/mg protein)</b>                | <b>MASS:CER</b>     | <b>#03</b>   | <b>#05</b>   | <b>#06</b>   | <b>#01</b>   | <b>#07</b>   | <b>#08</b>   | <b>#04</b>    | <b>#09</b>    | <b>#10</b>    | <b>#02</b>   | <b>#11</b>    | <b>#12</b>    |
| N22:0                                                  | 620.60              | 0.64         | 0.47         | 0.45         | 0.42         | 0.40         | 0.27         | 1.33          | 0.92          | 0.75          | 0.73         | 1.00          | 0.67          |
| N24:1                                                  | 646.61              | 0.31         | 0.41         | 0.37         | 0.26         | 0.21         | 0.18         | 0.69          | 0.86          | 0.66          | 0.50         | 0.46          | 0.48          |
| N24:0                                                  | 648.63              | 0.71         | 0.31         | 0.45         | 0.59         | 0.54         | 0.32         | 1.27          | 0.55          | 0.66          | 1.02         | 1.06          | 0.74          |
| <b>Sum</b>                                             |                     | <b>1.66</b>  | <b>1.19</b>  | <b>1.28</b>  | <b>1.28</b>  | <b>1.14</b>  | <b>0.77</b>  | <b>3.28</b>   | <b>2.33</b>   | <b>2.06</b>   | <b>2.24</b>  | <b>2.52</b>   | <b>1.90</b>   |
| <b>Phosphatidylinositol (PI) (nmol/mg protein)</b>     | <b>MASS:PI</b>      | <b>#03</b>   | <b>#05</b>   | <b>#06</b>   | <b>#01</b>   | <b>#07</b>   | <b>#08</b>   | <b>#04</b>    | <b>#09</b>    | <b>#10</b>    | <b>#02</b>   | <b>#11</b>    | <b>#12</b>    |
| 14:1-14:0                                              | 751.44              | 0.01         | 0.00         | 0.00         | 0.14         | 0.01         | 0.05         | 0.03          | 0.00          | 0.00          | 0.26         | 0.00          | 0.00          |
| 14:0-14:0                                              | 753.46              | 0.01         | 0.00         | 0.00         | 0.06         | 0.00         | 0.03         | 0.01          | 0.00          | 0.00          | 0.10         | 0.00          | 0.00          |
| 16:0-16:0                                              | 809.52              | 0.00         | 0.00         | 0.00         | 0.02         | 0.00         | 0.01         | 0.01          | 0.00          | 0.00          | 0.04         | 0.00          | 0.00          |
| 16:0-18:1                                              | 835.53              | 0.02         | 0.04         | 0.04         | 0.02         | 0.00         | 0.00         | 0.15          | 0.14          | 0.11          | 0.04         | 0.02          | 0.02          |
| 16:0-20:4                                              | 857.52              | 0.33         | 0.29         | 0.42         | 0.19         | 0.23         | 0.22         | 0.69          | 0.43          | 0.43          | 0.18         | 0.24          | 0.18          |
| 18:1-18:2                                              | 859.53              | 0.17         | 0.15         | 0.16         | 0.04         | 0.02         | 0.04         | 0.58          | 0.27          | 0.17          | 0.04         | 0.05          | 0.05          |
| 18:0-18:2                                              | 861.55              | 0.10         | 0.18         | 0.15         | 0.03         | 0.02         | 0.04         | 0.60          | 0.36          | 0.20          | 0.08         | 0.05          | 0.05          |
| 18:0-18:1                                              | 863.56              | 0.01         | 0.04         | 0.03         | 0.00         | 0.00         | 0.00         | 0.16          | 0.10          | 0.06          | 0.05         | 0.02          | 0.02          |
| 18:2-20:4/16:0-22:6                                    | 881.52              | 0.15         | 0.07         | 0.14         | 0.03         | 0.04         | 0.06         | 0.25          | 0.08          | 0.10          | 0.04         | 0.03          | 0.04          |
| 18:1-20:4                                              | 883.53              | 1.10         | 0.95         | 1.76         | 0.46         | 0.65         | 1.07         | 2.03          | 1.22          | 1.19          | 0.40         | 0.72          | 0.82          |
| 18:0-20:4                                              | 885.55              | 6.31         | 7.77         | 11.17        | 4.21         | 6.64         | 6.40         | 12.24         | 10.36         | 7.65          | 3.02         | 7.33          | 5.48          |
| <b>Sum</b>                                             |                     | <b>8.20</b>  | <b>8.56</b>  | <b>12.49</b> | <b>5.19</b>  | <b>7.60</b>  | <b>7.92</b>  | <b>16.75</b>  | <b>12.96</b>  | <b>9.92</b>   | <b>4.27</b>  | <b>8.46</b>   | <b>6.66</b>   |
| <b>Phosphatidylserine (PS) (nmol/mg protein)</b>       | <b>MASS:PS</b>      | <b>#03</b>   | <b>#05</b>   | <b>#06</b>   | <b>#01</b>   | <b>#07</b>   | <b>#08</b>   | <b>#04</b>    | <b>#09</b>    | <b>#10</b>    | <b>#02</b>   | <b>#11</b>    | <b>#12</b>    |
| 16:0-18:1                                              | 760.51              | 0.18         | 0.19         | 0.50         | 0.13         | 0.03         | 0.10         | 0.38          | 0.52          | 0.57          | 0.19         | 0.35          | 0.13          |
| 18:2-18:2                                              | 782.50              | 0.04         | 0.04         | 0.13         | 0.02         | 0.00         | 0.01         | 0.05          | 0.07          | 0.15          | 0.02         | 0.05          | 0.03          |
| 18:1-18:2                                              | 784.51              | 0.13         | 0.14         | 0.20         | 0.05         | 0.02         | 0.06         | 0.32          | 0.39          | 0.23          | 0.07         | 0.17          | 0.14          |
| 18:0-18:2                                              | 786.53              | 2.10         | 2.55         | 2.46         | 1.58         | 1.10         | 1.59         | 5.25          | 4.91          | 3.57          | 2.05         | 3.59          | 2.59          |
| 18:0-18:1                                              | 788.54              | 9.16         | 7.24         | 7.70         | 11.99        | 8.72         | 7.87         | 22.00         | 13.63         | 11.82         | 15.17        | 21.81         | 14.25         |
| 18:1-20:4                                              | 808.51              | 1.22         | 1.60         | 2.15         | 0.81         | 1.39         | 1.38         | 2.82          | 2.66          | 2.66          | 1.20         | 2.35          | 1.70          |
| 18:0-20:4                                              | 810.53              | 12.50        | 18.63        | 18.53        | 14.10        | 17.27        | 15.86        | 29.40         | 31.13         | 25.59         | 18.78        | 37.04         | 23.03         |
| 18:0-20:2                                              | 814.56              | 0.54         | 0.56         | 0.50         | 0.43         | 0.46         | 0.35         | 1.27          | 1.05          | 0.56          | 0.68         | 0.99          | 0.62          |
| 18:0-20:1                                              | 816.58              | 0.51         | 0.38         | 0.46         | 0.72         | 0.62         | 0.41         | 1.24          | 0.67          | 0.77          | 0.78         | 1.24          | 0.90          |
| 18:1-22:6                                              | 832.51              | 0.08         | 0.13         | 0.16         | 0.04         | 0.13         | 0.06         | 0.15          | 0.09          | 0.24          | 0.05         | 0.08          | 0.06          |
| 18:0-22:6                                              | 834.53              | 0.43         | 1.25         | 1.31         | 0.54         | 0.67         | 0.68         | 0.77          | 1.56          | 1.90          | 0.63         | 1.46          | 0.83          |

|                     |        |       |       |       |       |       |       |       |       |       |       |       |       |
|---------------------|--------|-------|-------|-------|-------|-------|-------|-------|-------|-------|-------|-------|-------|
| 18:0-22:5           | 836.54 | 0.77  | 1.31  | 1.09  | 0.67  | 0.83  | 0.80  | 1.36  | 1.69  | 1.27  | 0.65  | 1.75  | 1.05  |
| 20:0-20:4/18:0-22:4 | 838.56 | 0.63  | 1.01  | 0.90  | 0.88  | 0.99  | 0.80  | 1.17  | 1.26  | 1.26  | 0.88  | 1.93  | 1.26  |
| 20:0-20:3/18:0-22:3 | 840.58 | 0.10  | 0.08  | 0.12  | 0.15  | 0.10  | 0.03  | 0.25  | 0.24  | 0.17  | 0.12  | 0.18  | 0.20  |
| 20:0-20:2/18:0-22:2 | 842.59 | 0.16  | 0.27  | 0.18  | 0.22  | 0.16  | 0.12  | 0.63  | 0.67  | 0.51  | 0.37  | 0.57  | 0.36  |
| 20:0-20:1/18:0-22:1 | 844.61 | 0.09  | 0.05  | 0.09  | 0.37  | 0.21  | 0.13  | 0.37  | 0.09  | 0.08  | 0.39  | 0.52  | 0.28  |
| 20:0-22:5           | 864.58 | 0.05  | 0.08  | 0.07  | 0.05  | 0.08  | 0.06  | 0.05  | 0.14  | 0.10  | 0.09  | 0.12  | 0.06  |
| 20:0-22:4           | 866.59 | 0.05  | 0.03  | 0.06  | 0.04  | 0.06  | 0.02  | 0.08  | 0.13  | 0.15  | 0.10  | 0.15  | 0.09  |
| 20:0-22:3           | 868.61 | 0.01  | 0.02  | 0.00  | 0.03  | 0.01  | 0.01  | 0.09  | 0.11  | 0.05  | 0.06  | 0.04  | 0.05  |
| 20:0-22:2           | 870.62 | 0.00  | 0.01  | 0.00  | 0.03  | 0.00  | 0.00  | 0.08  | 0.12  | 0.07  | 0.06  | 0.06  | 0.04  |
| 20:0-22:1           | 872.64 | 0.00  | 0.00  | 0.00  | 0.05  | 0.01  | 0.00  | 0.02  | 0.00  | 0.00  | 0.05  | 0.02  | 0.02  |
| Sum                 |        | 28.76 | 35.54 | 36.61 | 32.91 | 32.85 | 30.35 | 67.74 | 61.10 | 51.71 | 42.40 | 74.48 | 47.69 |

**Lyso-Phosphatidylethanolamine (LPE)  
(nmol/mg protein)**

| MASS:LPE | #03    | #05  | #06  | #01  | #07  | #08  | #04  | #09  | #10  | #02  | #11  | #12  |      |
|----------|--------|------|------|------|------|------|------|------|------|------|------|------|------|
| P16:0    | 460.28 | 0.06 | 0.05 | 0.15 | 0.09 | 0.11 | 0.09 | 0.23 | 0.18 | 0.12 | 0.23 | 0.33 | 0.11 |
| 16:0     | 476.28 | 0.04 | 0.05 | 0.09 | 0.10 | 0.05 | 0.05 | 0.06 | 0.06 | 0.06 | 0.13 | 0.03 | 0.03 |
| P18:1    | 486.30 | 0.04 | 0.03 | 0.07 | 0.03 | 0.05 | 0.05 | 0.18 | 0.08 | 0.07 | 0.08 | 0.17 | 0.08 |
| P18:0    | 488.31 | 0.08 | 0.09 | 0.19 | 0.11 | 0.11 | 0.12 | 0.40 | 0.30 | 0.20 | 0.30 | 0.49 | 0.24 |
| 18:1     | 502.29 | 0.05 | 0.05 | 0.09 | 0.08 | 0.05 | 0.05 | 0.10 | 0.09 | 0.08 | 0.09 | 0.08 | 0.07 |
| 18:0     | 504.31 | 0.12 | 0.12 | 0.21 | 0.24 | 0.14 | 0.15 | 0.28 | 0.29 | 0.20 | 0.40 | 0.29 | 0.17 |
| 20:4     | 524.28 | 0.30 | 0.18 | 0.23 | 0.30 | 0.27 | 0.25 | 0.34 | 0.28 | 0.35 | 0.26 | 0.26 | 0.36 |
| Sum      |        | 0.70 | 0.57 | 1.04 | 0.94 | 0.79 | 0.77 | 1.58 | 1.27 | 1.08 | 1.49 | 1.66 | 1.05 |

**Sphingomyelin (SM) (nmol/mg protein)**

| MASS:SM | #03    | #05   | #06   | #01   | #07   | #08   | #04   | #09   | #10   | #02   | #11   | #12   |       |
|---------|--------|-------|-------|-------|-------|-------|-------|-------|-------|-------|-------|-------|-------|
| N14:0   | 681.55 | 0.62  | 0.37  | 0.64  | 0.55  | 0.58  | 0.75  | 1.51  | 0.76  | 1.07  | 0.89  | 1.24  | 1.37  |
| N15:0   | 695.57 | 0.25  | 0.26  | 0.30  | 0.20  | 0.26  | 0.37  | 0.58  | 0.51  | 0.55  | 0.40  | 0.67  | 0.66  |
| N16:1   | 707.57 | 0.77  | 0.91  | 0.88  | 0.62  | 0.66  | 0.61  | 1.68  | 1.85  | 1.37  | 1.09  | 1.62  | 1.16  |
| N16:0   | 709.58 | 5.16  | 5.35  | 5.70  | 6.32  | 5.35  | 4.83  | 11.18 | 11.08 | 9.69  | 10.92 | 12.71 | 8.30  |
| N17:0   | 723.60 | 0.09  | 0.11  | 0.11  | 0.07  | 0.10  | 0.11  | 0.17  | 0.27  | 0.21  | 0.14  | 0.26  | 0.22  |
| N18:1   | 735.60 | 0.23  | 0.48  | 0.40  | 0.19  | 0.24  | 0.27  | 0.52  | 0.95  | 0.70  | 0.38  | 0.57  | 0.50  |
| N18:0   | 737.61 | 0.62  | 1.16  | 0.94  | 0.55  | 0.44  | 0.77  | 1.41  | 2.32  | 1.60  | 0.94  | 1.15  | 1.29  |
| N19:0   | 751.63 | 0.02  | 0.06  | 0.05  | 0.01  | 0.03  | 0.05  | 0.06  | 0.14  | 0.10  | 0.03  | 0.09  | 0.12  |
| N20:1   | 763.63 | 0.23  | 0.31  | 0.37  | 0.16  | 0.17  | 0.28  | 0.63  | 0.69  | 0.69  | 0.30  | 0.51  | 0.50  |
| N20:0   | 765.65 | 1.19  | 0.98  | 1.52  | 0.98  | 0.88  | 1.42  | 2.95  | 2.07  | 2.71  | 1.87  | 2.49  | 2.43  |
| N21:0   | 779.66 | 0.14  | 0.06  | 0.14  | 0.11  | 0.12  | 0.19  | 0.35  | 0.17  | 0.23  | 0.23  | 0.35  | 0.36  |
| N22:2   | 789.65 | 0.17  | 0.22  | 0.20  | 0.11  | 0.10  | 0.14  | 0.45  | 0.49  | 0.33  | 0.25  | 0.32  | 0.25  |
| N22:1   | 791.66 | 1.45  | 0.81  | 1.26  | 1.14  | 1.00  | 1.20  | 3.55  | 1.84  | 2.38  | 2.20  | 2.96  | 2.31  |
| N22:0   | 793.68 | 3.28  | 1.29  | 2.81  | 3.92  | 3.10  | 3.13  | 7.88  | 2.92  | 5.35  | 7.76  | 9.13  | 5.83  |
| N23:1   | 805.68 | 0.17  | 0.10  | 0.12  | 0.14  | 0.11  | 0.14  | 0.39  | 0.22  | 0.23  | 0.26  | 0.37  | 0.29  |
| N23:0   | 807.69 | 0.33  | 0.16  | 0.23  | 0.39  | 0.29  | 0.34  | 0.90  | 0.33  | 0.45  | 0.85  | 0.94  | 0.64  |
| N24:3   | 815.66 | 0.10  | 0.09  | 0.06  | 0.06  | 0.05  | 0.05  | 0.29  | 0.19  | 0.11  | 0.18  | 0.17  | 0.11  |
| N24:2   | 817.68 | 1.30  | 0.85  | 0.78  | 1.33  | 0.69  | 0.65  | 2.87  | 1.88  | 1.47  | 2.61  | 2.09  | 1.31  |
| N24:1   | 819.69 | 3.87  | 1.89  | 2.32  | 4.56  | 2.61  | 2.25  | 9.58  | 4.24  | 4.61  | 9.29  | 7.85  | 4.42  |
| N24:0   | 821.71 | 1.33  | 0.36  | 0.68  | 2.06  | 1.41  | 1.13  | 3.17  | 0.83  | 1.38  | 4.33  | 4.40  | 2.23  |
| N25:1   | 833.71 | 0.04  | 0.03  | 0.03  | 0.08  | 0.02  | 0.03  | 0.10  | 0.06  | 0.07  | 0.10  | 0.16  | 0.09  |
| N25:0   | 835.72 | 0.05  | 0.01  | 0.02  | 0.05  | 0.03  | 0.02  | 0.06  | 0.03  | 0.02  | 0.07  | 0.16  | 0.08  |
| N26:2   | 845.71 | 0.02  | 0.01  | 0.00  | 0.02  | 0.01  | 0.00  | 0.04  | 0.03  | 0.03  | 0.03  | 0.05  | 0.02  |
| N26:1   | 847.72 | 0.05  | 0.01  | 0.02  | 0.05  | 0.02  | 0.02  | 0.11  | 0.02  | 0.03  | 0.11  | 0.08  | 0.04  |
| N26:0   | 849.74 | 0.02  | 0.00  | 0.00  | 0.02  | 0.01  | 0.00  | 0.00  | 0.00  | 0.00  | 0.03  | 0.05  | 0.01  |
| Sum     |        | 21.50 | 15.89 | 19.58 | 23.70 | 18.29 | 18.76 | 50.44 | 33.90 | 35.39 | 45.23 | 50.40 | 34.53 |

**Phosphatidylcholine (PC)  
(nmol/mg protein)**

| MASS:PC                                | #03    | #05   | #06  | #01   | #07   | #08   | #04  | #09   | #10   | #02   | #11   | #12   |       |
|----------------------------------------|--------|-------|------|-------|-------|-------|------|-------|-------|-------|-------|-------|-------|
| D14:0-16:0                             | 712.55 | 0.15  | 0.03 | 0.16  | 0.15  | 0.08  | 0.05 | 0.31  | 0.05  | 0.16  | 0.19  | 0.10  | 0.10  |
| A16:0-16:0                             | 726.60 | 0.36  | 0.25 | 0.33  | 0.26  | 0.21  | 0.16 | 0.40  | 0.32  | 0.35  | 0.37  | 0.28  | 0.32  |
| D16:1-16:1/D14:1-18:1                  | 736.55 | 0.17  | 0.02 | 0.07  | 0.06  | 0.02  | 0.02 | 0.24  | 0.03  | 0.08  | 0.07  | 0.02  | 0.05  |
| D16:1-16:0/D14:1-18:0                  | 738.56 | 0.69  | 0.40 | 0.74  | 0.69  | 0.46  | 0.30 | 1.34  | 0.72  | 0.93  | 0.86  | 0.57  | 0.50  |
| D16:0-16:0                             | 740.58 | 3.29  | 1.70 | 3.06  | 1.59  | 2.24  | 1.61 | 5.47  | 2.39  | 2.98  | 2.62  | 2.37  | 2.35  |
| P16:0-18:0/P18:1-16:0                  | 750.60 | 0.34  | 0.30 | 0.30  | 0.21  | 0.64  | 0.30 | 0.41  | 0.51  | 0.42  | 0.38  | 0.88  | 0.69  |
| P16:0-18:0/P18:0-16:0/A18:1-16:0/A16:0 | 752.61 | 0.60  | 0.67 | 0.86  | 0.54  | 1.15  | 0.61 | 1.16  | 1.14  | 1.18  | 0.81  | 1.55  | 1.14  |
| A16:0-18:0                             | 754.63 | 0.35  | 0.34 | 0.48  | 0.28  | 0.86  | 0.29 | 0.81  | 0.42  | 0.64  | 0.42  | 0.42  | 0.59  |
| D16:1-18:2                             | 762.56 | 0.59  | 0.13 | 0.20  | 0.23  | 0.12  | 0.11 | 0.92  | 0.23  | 0.25  | 0.31  | 0.18  | 0.18  |
| D16:0-18:2                             | 764.58 | 6.59  | 4.23 | 5.01  | 6.52  | 5.49  | 3.44 | 11.81 | 7.79  | 6.93  | 7.41  | 7.15  | 5.14  |
| D16:0-18:1                             | 766.59 | 11.08 | 9.68 | 12.33 | 13.71 | 12.61 | 8.18 | 22.25 | 17.28 | 18.01 | 17.05 | 18.86 | 15.66 |
| D16:0-18:0                             | 768.61 | 1.52  | 0.61 | 0.96  | 0.90  | 0.53  | 0.52 | 2.36  | 1.01  | 0.99  | 1.29  | 0.48  | 0.84  |
| P16:0-20:4/P20:4-16:0/P18:2-18:2       | 772.58 | 0.18  | 0.46 | 0.58  | 0.56  | 0.63  | 0.56 | 0.28  | 0.82  | 0.63  | 1.11  | 0.32  | 0.26  |
| A16:0-20:4                             | 774.60 | 0.11  | 2.18 | 2.48  | 3.41  | 3.01  | 2.38 | 0.18  | 3.15  | 3.68  | 4.65  | 6.80  | 6.42  |
| P18:1-18:1                             | 776.61 | 0.26  | 0.18 | 0.19  | 0.18  | 0.20  | 0.17 | 0.51  | 0.29  | 0.35  | 0.26  | 0.46  | 0.27  |
| P18:0-18:1/P18:1-18:0                  | 778.63 | 0.35  | 0.34 | 0.35  | 0.22  | 0.32  | 0.18 | 0.81  | 0.60  | 0.54  | 0.34  | 0.57  | 0.45  |
| A18:0-18:1/P18:0-18:0                  | 780.65 | 0.46  | 1.22 | 1.50  | 1.30  | 1.75  | 1.17 | 0.82  | 2.16  | 2.35  | 2.03  | 2.04  | 2.08  |
| D18:2-18:3/D16:1-20:4                  | 786.56 | 0.17  | 0.69 | 0.87  | 0.83  | 0.83  | 0.78 | 0.31  | 1.01  | 1.15  | 1.23  | 0.62  | 0.07  |
| D18:2-18:2/D16:0-20:4                  | 788.58 | 1.93  | 4.25 | 5.99  | 5.51  | 7.04  | 5.72 | 2.77  | 6.06  | 6.16  | 5.27  | 8.17  | 6.45  |
| D18:1-18:2/D16:0-20:3                  | 790.59 | 4.12  | 2.72 | 2.95  | 2.07  | 3.22  | 2.31 | 6.71  | 4.67  | 3.80  | 3.05  | 4.07  | 3.45  |
| D18:0-18:2/D18:1-18:1                  | 792.61 | 5.09  | 3.83 | 3.85  | 3.70  | 5.04  | 3.19 | 10.30 | 7.08  | 5.59  | 5.46  | 6.80  | 4.76  |
| D18:0-18:1                             | 794.63 | 3.82  | 3.01 | 3.53  | 3.98  | 5.48  | 3.39 | 8.07  | 5.64  | 5.50  | 5.65  | 8.36  | 6.08  |
| D18:0-18:0                             | 796.64 | 0.36  | 0.06 | 0.25  | 0.37  | 0.26  | 0.17 | 0.64  | 0.13  | 0.34  | 0.49  | 0.32  | 0.35  |
| P18:1-20:4                             | 798.60 | 0.22  | 0.22 | 0.34  | 0.17  | 0.97  | 0.33 | 0.20  | 0.31  | 0.44  | 0.23  | 0.89  | 0.66  |
| P18:0-20:4                             | 800.61 | 1.37  | 1.55 | 2.15  | 1.19  | 3.46  | 2.07 | 1.84  | 2.54  | 2.44  | 1.31  | 5.54  | 3.07  |

|                                  |        |       |       |       |       |       |       |        |       |       |       |        |       |
|----------------------------------|--------|-------|-------|-------|-------|-------|-------|--------|-------|-------|-------|--------|-------|
| P18:2-20:1/P20:1-18:2/A18:0-20:4 | 802.63 | 0.16  | 0.90  | 1.30  | 0.82  | 1.20  | 1.05  | 0.26   | 1.65  | 1.65  | 1.44  | 1.76   | 1.48  |
| P18:0-20:1/P16:0-22:1            | 806.66 | 0.63  | 0.45  | 0.31  | 0.27  | 0.87  | 0.30  | 2.65   | 0.52  | 0.63  | 0.62  | 0.55   | 0.64  |
| P18:0-20:0/P16:0-22:0            | 808.68 | 0.03  | 0.63  | 0.54  | 0.75  | 0.69  | 0.62  | 0.04   | 0.93  | 0.97  | 1.04  | 0.37   | 0.07  |
| D16:0-22:6/D18:2-20:4            | 812.58 | 3.34  | 0.49  | 0.79  | 0.73  | 0.72  | 0.68  | 4.68   | 0.75  | 1.23  | 0.97  | 0.99   | 0.88  |
| D18:1-20:4/D16:0-22:5            | 814.59 | 2.18  | 1.87  | 2.27  | 1.79  | 2.80  | 2.18  | 3.05   | 2.83  | 2.60  | 1.76  | 2.67   | 1.37  |
| D18:2-20:2/D18:0-20:4            | 816.61 | 4.02  | 3.69  | 4.82  | 4.82  | 7.26  | 5.29  | 6.53   | 6.15  | 5.78  | 4.63  | 8.95   | 5.92  |
| D18:0-20:3                       | 818.63 | 1.26  | 0.78  | 0.86  | 0.75  | 1.11  | 0.66  | 2.42   | 1.55  | 1.41  | 1.33  | 2.67   | 2.75  |
| D18:0-20:2/P18:2-22:6            | 820.64 | 0.65  | 0.28  | 0.41  | 0.50  | 0.47  | 0.30  | 1.15   | 0.51  | 0.61  | 0.71  | 0.91   | 0.61  |
| D18:0-20:1/P18:1-22:6            | 822.66 | 0.32  | 0.05  | 0.16  | 0.34  | 0.17  | 0.11  | 0.59   | 0.10  | 0.26  | 0.45  | 0.34   | 0.24  |
| P18:0-22:6                       | 824.61 | 0.03  | 0.03  | 0.06  | 0.10  | 0.37  | 0.06  | 0.02   | 0.00  | 0.06  | 0.07  | 0.21   | 0.11  |
| D18:2-22:6                       | 836.58 | 1.42  | 0.20  | 0.28  | 0.34  | 0.28  | 0.23  | 2.34   | 0.20  | 0.33  | 0.27  | 0.43   | 0.24  |
| D18:1-22:6/D18:2-22:5            | 838.59 | 2.18  | 0.30  | 0.39  | 0.43  | 0.34  | 0.25  | 2.74   | 0.37  | 0.44  | 0.38  | 0.46   | 0.28  |
| D18:0-22:6                       | 840.61 | 1.88  | 0.42  | 0.51  | 0.42  | 0.58  | 0.46  | 2.14   | 0.63  | 0.62  | 0.50  | 0.82   | 0.54  |
| D18:0-22:5                       | 842.63 | 1.94  | 0.38  | 0.49  | 0.42  | 0.77  | 0.55  | 2.88   | 0.60  | 0.59  | 0.49  | 1.18   | 0.67  |
| D18:0-22:4/D20:0-20:4/D20:2-20:2 | 844.64 | 0.94  | 0.10  | 0.31  | 0.29  | 0.51  | 0.33  | 1.79   | 0.24  | 0.43  | 0.35  | 0.86   | 0.50  |
| Sum                              |        | 65.15 | 49.65 | 63.01 | 61.38 | 74.78 | 51.08 | 114.22 | 83.36 | 83.46 | 77.85 | 100.96 | 78.26 |

**Lyso Phosphatidylcholine (LPC)  
(nmol/mg protein)**

| MASS:LPC | #03    | #05  | #06  | #01  | #07  | #08  | #04  | #09  | #10  | #02  | #11  | #12  |      |
|----------|--------|------|------|------|------|------|------|------|------|------|------|------|------|
| 14:0     | 490.29 | 0.02 | 0.01 | 0.01 | 0.06 | 0.01 | 0.02 | 0.00 | 0.01 | 0.02 | 0.10 | 0.00 | 0.00 |
| P16:0    | 502.33 | 0.18 | 0.10 | 0.19 | 0.10 | 0.13 | 0.19 | 0.26 | 0.18 | 0.27 | 0.11 | 0.27 | 0.20 |
| A16:0    | 504.34 | 0.07 | 0.06 | 0.10 | 0.13 | 0.06 | 0.07 | 0.05 | 0.12 | 0.13 | 0.15 | 0.12 | 0.09 |
| 16:1     | 516.31 | 0.15 | 0.09 | 0.09 | 0.08 | 0.08 | 0.12 | 0.08 | 0.08 | 0.14 | 0.04 | 0.15 | 0.13 |
| 16:0     | 518.32 | 0.41 | 0.29 | 0.70 | 0.83 | 0.71 | 0.65 | 0.39 | 0.60 | 1.07 | 1.33 | 0.86 | 0.91 |
| P18:0    | 530.36 | 0.16 | 0.08 | 0.14 | 0.10 | 0.11 | 0.15 | 0.22 | 0.19 | 0.26 | 0.11 | 0.32 | 0.19 |
| 18:2     | 542.32 | 0.04 | 0.01 | 0.02 | 0.06 | 0.02 | 0.03 | 0.05 | 0.02 | 0.06 | 0.11 | 0.04 | 0.07 |
| 18:1     | 544.34 | 0.12 | 0.08 | 0.15 | 0.16 | 0.11 | 0.12 | 0.15 | 0.22 | 0.27 | 0.33 | 0.54 | 0.41 |
| 18:0     | 546.35 | 0.30 | 0.21 | 0.38 | 0.55 | 0.34 | 0.33 | 0.30 | 0.56 | 0.65 | 0.80 | 0.96 | 0.86 |
| 20:4     | 566.32 | 0.03 | 0.02 | 0.03 | 0.06 | 0.04 | 0.04 | 0.03 | 0.02 | 0.06 | 0.08 | 0.08 | 0.08 |
| Sum      |        | 1.46 | 0.95 | 1.82 | 2.13 | 1.60 | 1.72 | 1.51 | 1.99 | 2.94 | 3.17 | 3.34 | 2.95 |

**Acyl-carnitine (CAR) (pmol/mg protein)**

| MASS:CAR | #03    | #05   | #06   | #01   | #07   | #08  | #04   | #09   | #10   | #02   | #11    | #12   |       |
|----------|--------|-------|-------|-------|-------|------|-------|-------|-------|-------|--------|-------|-------|
| 14:0     | 372.31 | 0.82  | 0.89  | 2.54  | 1.55  | 0.57 | 0.96  | 0.75  | 0.61  | 0.36  | 2.37   | 1.69  | 1.06  |
| 16:0     | 400.34 | 4.62  | 15.46 | 20.39 | 13.23 | 3.91 | 9.91  | 17.27 | 6.32  | 14.16 | 33.19  | 8.80  | 7.23  |
| 18:1     | 426.36 | 0.50  | 1.64  | 4.73  | 2.98  | 0.69 | 1.78  | 2.34  | 2.24  | 1.38  | 4.40   | 4.34  | 2.26  |
| 18:0     | 428.37 | 12.98 | 6.68  | 4.24  | 8.02  | 1.84 | 5.15  | 31.14 | 76.60 | 40.45 | 61.14  | 55.05 | 44.98 |
| 20:4     | 448.34 | 0.05  | 0.20  | 0.28  | 1.65  | 0.31 | 0.23  | 0.61  | 0.68  | 1.43  | 2.27   | 1.73  | 1.16  |
| Sum      |        | 18.98 | 24.88 | 32.19 | 27.43 | 7.31 | 18.03 | 52.12 | 86.45 | 57.78 | 103.36 | 71.60 | 56.70 |

**Cardiolipin (CL) (nmol/mg protein)**

| MASS:CL             | #03    | #05  | #06  | #01  | #07  | #08  | #04  | #09  | #10  | #02  | #11  | #12  |      |
|---------------------|--------|------|------|------|------|------|------|------|------|------|------|------|------|
| 18:2-18:2-18:2-18:2 | 723.98 | 0.22 | 0.24 | 0.25 | 0.36 | 0.23 | 0.22 | 0.38 | 0.48 | 0.26 | 0.46 | 0.50 | 0.32 |
| 18:2-18:2-18:2-18:1 | 724.99 | 0.14 | 0.21 | 0.27 | 0.31 | 0.16 | 0.18 | 0.27 | 0.43 | 0.31 | 0.41 | 0.41 | 0.25 |
| 18:2-18:2-18:1-18:1 | 726.00 | 0.01 | 0.06 | 0.08 | 0.02 | 0.03 | 0.04 | 0.05 | 0.10 | 0.09 | 0.00 | 0.08 | 0.05 |
| 18:2-18:2-18:2-20:4 | 735.98 | 0.02 | 0.02 | 0.02 | 0.02 | 0.04 | 0.04 | 0.03 | 0.05 | 0.03 | 0.03 | 0.09 | 0.06 |
| 18:2-18:2-18:2-20:3 | 736.99 | 0.06 | 0.03 | 0.06 | 0.05 | 0.04 | 0.04 | 0.13 | 0.07 | 0.06 | 0.06 | 0.11 | 0.07 |
| 18:2-18:2-18:1-20:3 | 738.00 | 0.03 | 0.03 | 0.04 | 0.02 | 0.02 | 0.02 | 0.07 | 0.05 | 0.05 | 0.03 | 0.06 | 0.03 |
| Sum                 |        | 0.49 | 0.59 | 0.72 | 0.77 | 0.52 | 0.54 | 0.93 | 1.19 | 0.81 | 0.99 | 1.25 | 0.79 |

**Phosphatidylglycerol (PG)  
(nmol/mg protein)**

| MASS:PG   | #03    | #05  | #06  | #01  | #07  | #08  | #04  | #09  | #10  | #02  | #11  | #12  |      |
|-----------|--------|------|------|------|------|------|------|------|------|------|------|------|------|
| 16:0-16:0 | 721.50 | 0.00 | 0.00 | 0.00 | 0.00 | 0.00 | 0.00 | 0.02 | 0.00 | 0.01 | 0.01 | 0.01 | 0.00 |
| 16:0-18:2 | 745.50 | 0.00 | 0.08 | 0.00 | 0.00 | 0.05 | 0.00 | 0.08 | 0.23 | 0.08 | 0.06 | 0.05 | 0.08 |
| 16:0-18:1 | 747.52 | 0.01 | 0.02 | 0.02 | 0.05 | 0.05 | 0.01 | 0.20 | 0.39 | 0.23 | 0.20 | 0.13 | 0.17 |
| 18:2-18:2 | 769.50 | 0.01 | 0.00 | 0.01 | 0.00 | 0.00 | 0.00 | 0.06 | 0.15 | 0.08 | 0.06 | 0.06 | 0.07 |
| 18:1-18:2 | 771.52 | 0.01 | 0.00 | 0.00 | 0.00 | 0.00 | 0.00 | 0.06 | 0.08 | 0.03 | 0.01 | 0.02 | 0.02 |
| 18:1-18:1 | 773.53 | 0.01 | 0.16 | 0.01 | 0.03 | 0.06 | 0.01 | 0.12 | 0.22 | 0.11 | 0.09 | 0.08 | 0.09 |
| 18:0-18:1 | 775.55 | 0.01 | 0.00 | 0.03 | 0.07 | 0.02 | 0.02 | 0.19 | 0.17 | 0.17 | 0.15 | 0.16 | 0.13 |
| 18:0-18:0 | 777.57 | 0.02 | 0.01 | 0.03 | 0.09 | 0.03 | 0.04 | 0.39 | 0.03 | 0.04 | 0.15 | 0.15 | 0.09 |
| 18:1-20:4 | 795.52 | 0.01 | 0.00 | 0.01 | 0.00 | 0.00 | 0.00 | 0.04 | 0.11 | 0.08 | 0.00 | 0.05 | 0.06 |
| Sum       |        | 0.09 | 0.27 | 0.12 | 0.24 | 0.23 | 0.09 | 1.15 | 1.39 | 0.82 | 0.73 | 0.69 | 0.71 |

**Phosphatidic acid (PA) (nmol/mg protein)**

| MASS:PA             | #03    | #05  | #06  | #01  | #07  | #08  | #04  | #09  | #10  | #02  | #11  | #12  |      |
|---------------------|--------|------|------|------|------|------|------|------|------|------|------|------|------|
| 16:0-18:2           | 671.47 | 0.02 | 0.02 | 0.02 | 0.01 | 0.01 | 0.01 | 0.03 | 0.12 | 0.02 | 0.03 | 0.03 | 0.03 |
| 16:0-18:1           | 673.48 | 0.01 | 0.01 | 0.01 | 0.01 | 0.00 | 0.00 | 0.04 | 0.04 | 0.03 | 0.04 | 0.02 | 0.03 |
| 18:0-18:2/18:1-18:1 | 699.50 | 0.01 | 0.01 | 0.01 | 0.03 | 0.01 | 0.01 | 0.05 | 0.07 | 0.03 | 0.06 | 0.03 | 0.03 |
| 18:0-18:1           | 701.51 | 0.03 | 0.01 | 0.02 | 0.03 | 0.01 | 0.01 | 0.11 | 0.05 | 0.06 | 0.05 | 0.08 | 0.06 |
| 18:0-20:4           | 723.50 | 0.05 | 0.09 | 0.05 | 0.07 | 0.06 | 0.03 | 0.24 | 0.24 | 0.33 | 0.31 | 0.63 | 0.86 |
| Sum                 |        | 0.12 | 0.15 | 0.10 | 0.15 | 0.09 | 0.07 | 0.46 | 0.52 | 0.47 | 0.47 | 0.79 | 1.01 |
